# Supplementary material
Source: publisher site journal article supplement (http://www.dovepress.com/get_supplementary_file.php?f=247210.xlsx)
Supplement: Supplementary file 1 [file get_supplementary_file.php]

## Sheet: Qualitative Analysis on top 22
	Supplementary Table Qualitative analysis on the top 22 most cited articles in the exosomes field of study
		Source Information	Subjects																																				Methods
			Exosomes													Cancer/Experimental Cells										Targeting					Protective Mechanism								Characterization and Quantification of Exosomes
	No	TITLE	Exosomal Protein	microRNA	Tumor-Derived Exosome	Exosomal Membrane	Exosomal Markers	Exosome-Derived DNA	Serum-Derived Exosome	Microvesicles	Multivesicular Endosomes	Liposomes (Synthetic Lipid Vesicles)	Exosome-Like Vesicles (ELVs)	Extracellular Vesicles (EVs)	Exosome-Like Nanoparticles	Breast Cancer Cells	Prostate Cancer Cells	Pancreatic Cancer Cells	Pulmonary Metastases Cancer Cells	Ovarian Cancer Cells	Intestinal Stem Cells	Mammalian Cells	Metastatic Bone	Lung Cancer Cells	Monocyte-Derived Dendritic Cells	Exosome Release	Exosome Cargo	Exosome Detection	Exosome Purification	Exosome Secretion	Hypoxic Enhancement	Premature Cellular Senescence	Serum-Exosome Protein	Exosome-Based Drug Delivery	A Microfluidic ExoSearch Chip	Integrated Magnetic−Electrochemical Exosome (iMEX)	Tunable Resistive Pulse Sensing	Nanoparticle-Mediated Protein Delivery	Nanoparticle Tracking Analysis (NTA)	Cell Culture	Plasma Collection	Exosome Isolation	RNA Extraction	Protein Extraction	Flow Cytometry	Western Blot Analysis (WB)	Immunoblotting	Immunolabelling	Immunohistochemistry Analysis
	1	Hypoxic enhancement of exosome release by breast cancer cells	1	1		1	1			1			1	1	1	1										1	1	1	1		1								1	1		1	1				1	1
	2	Senescence-associated exosome release from human prostate cancer cells	1	1	1	1	1	1	1	1	1	1	1				1									1	1		1	1		1								1		1	1			1	1		1
	3	Combined evaluation of a panel of protein and miRNA serum-exosome biomarkers for pancreatic cancer diagnosis increases sensitivity and specificity	1	1	1		1		1					1				1								1		1	1				1							1		1			1
	4	Development of exosome-encapsulated paclitaxel to overcome MDR in cancer cells	1		1	1			1			1			1				1							1			1					1					1	1		1				1
	5	A microfluidic ExoSearch chip for multiplexed exosome detection towards blood-based ovarian cancer diagnosis	1		1	1							1		1					1						1	1	1							1				1			1			1	1
	6	Analysis of exosome purification methods using a model liposome system and tunable-resistive pulse sensing	1							1		1	1		1	1													1								1			1		1
	7	A Comparative Study of Serum Exosome Isolation Using Differential Ultracentrifugation and Three Commercial Reagents	1	1		1	1		1			1			1														1				1						1		1	1	1			1	1	1
	8	Microvesicle- and exosome-mediated drug delivery enhances the cytotoxicity of Paclitaxel in autologous prostate cancer cells	1		1	1	1			1		1		1			1									1	1		1					1					1	1		1			1	1
	9	Plasma exosome microRNAs are indicative of breast cancer	1	1	1	1			1					1		1										1		1					1						1	1	1	1	1			1		1
	10	Grape Exosome-like Nanoparticles Induce Intestinal Stem Cells and Protect Mice From DSS-Induced Colitis	1	1			1			1		1			1	1					1								1					1						1		1			1	1
	11	Integrated Magneto-Electrochemical Sensor for Exosome Analysis	1		1	1	1						1	1	1					1								1	1							1				1	1	1			1	1
	12	Nanoparticle tracking analysis monitors microvesicle and exosome secretion from immune cells	1			1	1		1	1			1		1										1	1		1	1	1									1	1		1			1		1
	13	Interspecies communication between plant and mouse gut host cells through edible plant derived exosome-like nanoparticles	1	1								1		1	1						1	1				1			1									1		1		1	1			1
	14	High prevalence of mutant KRAS in circulating exosome-derived DNA from early-stage pancreatic cancer patients	1		1		1	1						1				1										1											1		1	1			1	1
	15	Reproducibility and efficiency of serum-derived exosome extraction methods	1				1		1				1		1		1												1				1					1	1	1	1	1				1
	16	Exosome engineering for efficient intracellular delivery of soluble proteins using optically reversible protein-protein interaction module	1			1	1	1				1		1	1							1				1	1		1					1				1	1	1		1		1		1	1		1
	17	Single exosome study reveals subpopulations distributed among cell lines with variability related to membrane content	1	1		1				1		1		1			1									1		1	1										1	1	1	1				1	1
	18	Maximizing exosome colloidal stability following electroporation	1		1	1			1			1	1		1							1				1	1		1					1				1		1	1		1
	19	miRNA cargo within exosome-like vesicle transfer influences metastatic bone colonization	1	1	1	1			1	1		1	1	1									1	1		1	1			1									1	1		1			1	1			1
	20	Serum Exosome MicroRNA as a Minimally-Invasive Early Biomarker of AML	1	1			1		1				1													1	1	1	1	1			1							1	1		1		1				1
	21	Different Exosome Cargo from Plasma/Bronchoalveolar Lavage in Non-Small-Cell Lung Cancer	1	1	1	1	1						1	1										1		1	1												1	1	1	1	1	1		1
	22	Epidermal growth factor receptor localized to exosome membranes as a possible biomarker for lung cancer diagnosis	1		1	1	1		1				1											1				1	1	1			1							1	1	1				1	1		1
[truncated: 26 more columns]
